# Supplementary material
Source: MDPI journal article supplement (https://www.mdpi.com/1996-1073/17/6/1455)
Supplement: s1 [file s1]

Archive with 1 entries (1 files):
- energies-2879433-supplementary.pdf
